# Supplementary material for: Effectiveness comparisons of drug therapies for postoperative aneurysmal subarachnoid hemorrhage patients: network meta‑analysis and systematic review
Source: PubMed Central journal article supplement (PMC8314452; doi:10.1186/s12883-021-02303-8), 2021-07-27
Supplement: 12883_2021_2303_MOESM2_ESM.pdf [file 12883_2021_2303_MOESM2_ESM.pdf]

# Effectiveness Comparisons of Drug Therapies for Postoperative Aneurysmal Subarachnoid Hemorrhage Patients: Network Meta-analysis and systematic review

Wanli Yu<sup>1#</sup>, MM, Yizhou Huang<sup>2#</sup>, MM, Xiaolin Zhang<sup>1</sup>, MM, Huirong Luo<sup>3</sup>, Weifu Chen<sup>1</sup>, MD, Yongxiang Jiang<sup>1\*</sup>, MD, Yuan Cheng<sup>1\*</sup>, MD

<sup>1</sup> Department of Neurosurgery, The Second Affiliated Hospital, Chongqing Medical University, Chongqing, China

<sup>2</sup> Department of Endocrinology, The Second Affiliated Hospital, Chongqing Medical University, Chongqing, China

<sup>3</sup> Department of Psychiatry, The First Affiliated Hospital, Chongqing Medical University, Chongqing, China

# Wanli Yu and Yizhou Huang contributed equally to this project.

## \* Correspondence:

Yuan Cheng, Department of Neurosurgery, The Second Affiliated Hospital, Chongqing Medical University; Yongxiang Jiang, Department of Neurosurgery, The Second Affiliated Hospital, Chongqing Medical University;

E-mail address: [chengyuan@hospital.cqmu.edu.cn](mailto:chengyuan@hospital.cqmu.edu.cn) and [doctorjiang2003@163.com](mailto:doctorjiang2003@163.com)

|                      | Random sequence generation (selection bias) | Allocation concealment (selection bias) | Blinding of participants and personnel (performance bias) | Blinding of outcome assessment (detection bias) | Incomplete outcome data (attrition bias) | Selective reporting (reporting bias) | Other bias |
|----------------------|---------------------------------------------|-----------------------------------------|-----------------------------------------------------------|-------------------------------------------------|------------------------------------------|--------------------------------------|------------|
| akdemir2009          | +                                           | +                                       | +                                                         | ?                                               | +                                        | +                                    | ?          |
| barth2006            | +                                           | +                                       | +                                                         | +                                               | +                                        | +                                    | +          |
| Boet2005             | +                                           | +                                       | +                                                         | ?                                               | ?                                        | +                                    | ?          |
| chou2008             | +                                           | +                                       | +                                                         | ?                                               | +                                        | +                                    | ?          |
| etminan2013          | +                                           | +                                       | +                                                         | +                                               | +                                        | +                                    | ?          |
| fujimura2017         | +                                           | +                                       | +                                                         | +                                               | +                                        | +                                    | ?          |
| garg2013             | +                                           | +                                       | +                                                         | +                                               | +                                        | +                                    | ?          |
| gomis2010            | +                                           | +                                       | +                                                         | ?                                               | +                                        | +                                    | ?          |
| haley1993            | +                                           | +                                       | +                                                         | +                                               | +                                        | +                                    | ?          |
| haley1995            | +                                           | +                                       | +                                                         | +                                               | +                                        | +                                    | ?          |
| haley1997            | +                                           | +                                       | +                                                         | ?                                               | +                                        | +                                    | ?          |
| hassan2011           | +                                           | +                                       | ?                                                         | +                                               | +                                        | +                                    | ?          |
| jan1988              | +                                           | +                                       | +                                                         | ?                                               | ?                                        | +                                    | ?          |
| JingjianMA2009       | +                                           | +                                       | ?                                                         | ?                                               | +                                        | +                                    | ?          |
| kassell1996          | +                                           | +                                       | +                                                         | +                                               | +                                        | +                                    | ?          |
| kirkpatrick2014      | +                                           | +                                       | +                                                         | ?                                               | +                                        | +                                    | ?          |
| lanzino1999          | +                                           | +                                       | +                                                         | ?                                               | +                                        | +                                    | ?          |
| macdonald2008        | +                                           | +                                       | +                                                         | +                                               | ?                                        | +                                    | ?          |
| macdonald2011        | +                                           | +                                       | +                                                         | +                                               | +                                        | +                                    | +          |
| macdonald2012        | +                                           | +                                       | +                                                         | +                                               | +                                        | +                                    | ?          |
| matsuda2016          | +                                           | +                                       | +                                                         | +                                               | ?                                        | +                                    | ?          |
| mees2012             | +                                           | +                                       | +                                                         | +                                               | +                                        | +                                    | ?          |
| muroi2008            | +                                           | +                                       | ?                                                         | +                                               | +                                        | +                                    | ?          |
| nakagawa2016         | ?                                           | ?                                       | +                                                         | ?                                               | +                                        | +                                    | +          |
| naraoka2017          | +                                           | +                                       | +                                                         | +                                               | +                                        | +                                    | +          |
| ohman1991            | +                                           | +                                       | +                                                         | ?                                               | +                                        | +                                    | ?          |
| petruk1988           | +                                           | +                                       | +                                                         | +                                               | +                                        | +                                    | +          |
| philippon 1986       | ?                                           | ?                                       | ?                                                         | +                                               | +                                        | +                                    | +          |
| pickard1989          | +                                           | +                                       | +                                                         | +                                               | +                                        | +                                    | +          |
| schmid-elsaesser2006 | +                                           | +                                       | +                                                         | +                                               | +                                        | +                                    | ?          |
| senbokuya2013        | +                                           | ?                                       | ?                                                         | +                                               | +                                        | ?                                    | ?          |
| shibuya1992          | +                                           | +                                       | +                                                         | +                                               | +                                        | +                                    | +          |
| siironen2003         | +                                           | +                                       | +                                                         | ?                                               | +                                        | +                                    | ?          |
| springborg2007       | +                                           | +                                       | +                                                         | ?                                               | +                                        | +                                    | ?          |
| suzuki2011           | +                                           | ?                                       | ?                                                         | ?                                               | +                                        | ?                                    | ?          |
| Tseng2005            | +                                           | +                                       | ?                                                         | ?                                               | +                                        | +                                    | ?          |
| vandenbergh2005      | +                                           | +                                       | +                                                         | ?                                               | +                                        | +                                    | ?          |
| vergouwen2009        | +                                           | +                                       | ?                                                         | +                                               | +                                        | +                                    | ?          |
| westermaier2010      | +                                           | +                                       | +                                                         | ?                                               | +                                        | +                                    | ?          |
| wong2006             | +                                           | +                                       | +                                                         | ?                                               | +                                        | +                                    | ?          |
| wong2010             | +                                           | +                                       | +                                                         | +                                               | +                                        | +                                    | +          |
| yoshimoto2009        | ?                                           | ?                                       | ?                                                         | ?                                               | +                                        | +                                    | +          |
| zhao2006             | +                                           | +                                       | ?                                                         | ?                                               | +                                        | +                                    | ?          |
| zhao2011             | +                                           | ?                                       | +                                                         | +                                               | +                                        | ?                                    | +          |

Supplement Figure.2 legend Summary of risk of bias assessment. Risk of bias of included RCTs (Review authors' judgments about each risk of bias item for each

included study. +, low risk; -, high risk; ?, unclear risk.). RCT, randomized controlled trial.
