# Supplementary material for: Effectiveness comparisons of drug therapies for postoperative aneurysmal subarachnoid hemorrhage patients: network meta‑analysis and systematic review
Source: PubMed Central journal article supplement (PMC8314452; doi:10.1186/s12883-021-02303-8), 2021-07-27
Supplement: 12883_2021_2303_MOESM3_ESM.pdf [file 12883_2021_2303_MOESM3_ESM.pdf]

# Effectiveness Comparisons of Drug Therapies for Postoperative Aneurysmal Subarachnoid Hemorrhage Patients: Network Meta-analysis and systematic review

Wanli Yu<sup>1#</sup>, MM, Yizhou Huang<sup>2#</sup>, MM, Xiaolin Zhang<sup>1</sup>, MM, Huirong Luo<sup>3</sup>, Weifu Chen<sup>1</sup>, MD, Yongxiang Jiang<sup>1\*</sup>, MD, Yuan Cheng<sup>1\*</sup>, MD

<sup>1</sup> Department of Neurosurgery, The Second Affiliated Hospital, Chongqing Medical University, Chongqing, China

<sup>2</sup> Department of Endocrinology, The Second Affiliated Hospital, Chongqing Medical University, Chongqing, China

<sup>3</sup> Department of Psychiatry, The First Affiliated Hospital, Chongqing Medical University, Chongqing, China

# Wanli Yu and Yizhou Huang contributed equally to this project.

## \* Correspondence:

Yuan Cheng, Department of Neurosurgery, The Second Affiliated Hospital, Chongqing Medical University; Yongxiang Jiang, Department of Neurosurgery, The Second Affiliated Hospital, Chongqing Medical University;

E-mail address: [chengyuan@hospital.cqmu.edu.cn](mailto:chengyuan@hospital.cqmu.edu.cn) and [doctorjiang2003@163.com](mailto:doctorjiang2003@163.com)

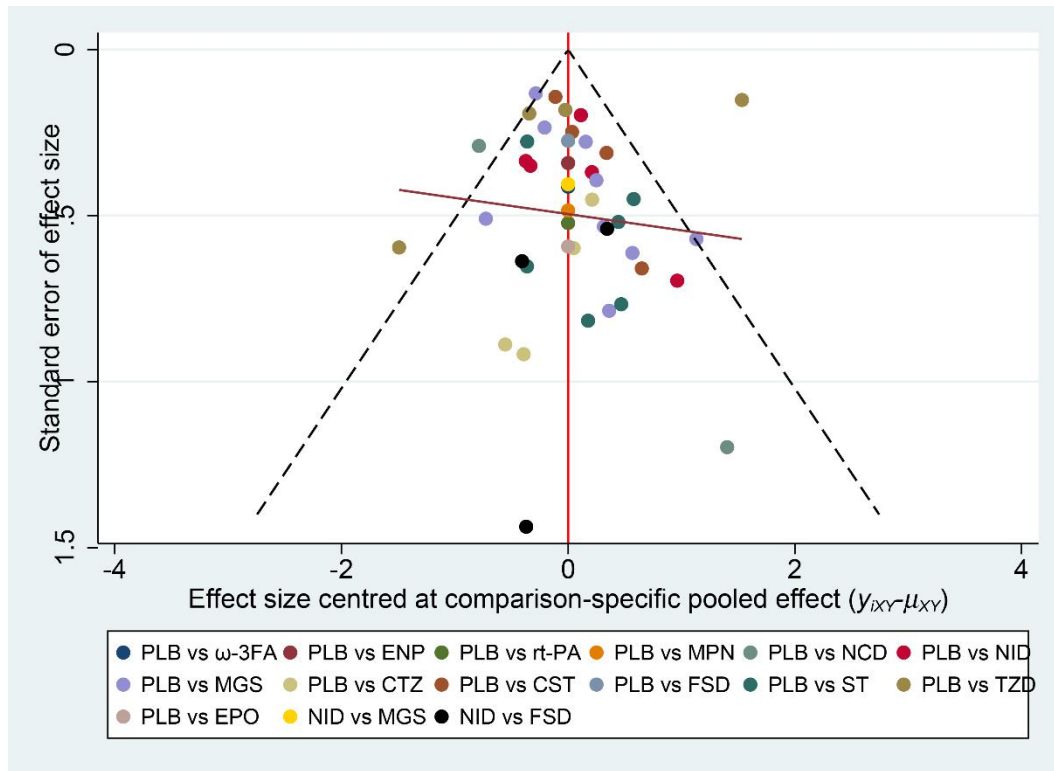

Supplement Figure.3 legend funnel plot. Red line suggests null hypothesis that study-specific effect sizes do not differ from respective comparison-specific pooled effect estimates. Different colors represent different comparisons.
