# Supplementary material for: Effectiveness comparisons of drug therapies for postoperative aneurysmal subarachnoid hemorrhage patients: network meta‑analysis and systematic review
Source: PubMed Central journal article supplement (PMC8314452; doi:10.1186/s12883-021-02303-8), 2021-07-27
Supplement: 12883_2021_2303_MOESM4_ESM.pdf [file 12883_2021_2303_MOESM4_ESM.pdf]

# Effectiveness Comparisons of Drug Therapies for Postoperative Aneurysmal Subarachnoid Hemorrhage Patients: Network Meta-analysis and systematic review

Wanli Yu<sup>1#</sup>, MM, Yizhou Huang<sup>2#</sup>, MM, Xiaolin Zhang<sup>1</sup>, MM, Huirong Luo<sup>3</sup>, Weifu Chen<sup>1</sup>, MD, Yongxiang Jiang<sup>1\*</sup>, MD, Yuan Cheng<sup>1\*</sup>, MD

<sup>1</sup> Department of Neurosurgery, The Second Affiliated Hospital, Chongqing Medical University, Chongqing, China

<sup>2</sup> Department of Endocrinology, The Second Affiliated Hospital, Chongqing Medical University, Chongqing, China

<sup>3</sup> Department of Psychiatry, The First Affiliated Hospital, Chongqing Medical University, Chongqing, China

# Wanli Yu and Yizhou Huang contributed equally to this project.

## \* Correspondence:

Yuan Cheng, Department of Neurosurgery, The Second Affiliated Hospital, Chongqing Medical University; Yongxiang Jiang, Department of Neurosurgery, The Second Affiliated Hospital, Chongqing Medical University;

E-mail address: [chengyuan@hospital.cqmu.edu.cn](mailto:chengyuan@hospital.cqmu.edu.cn) and [doctorjiang2003@163.com](mailto:doctorjiang2003@163.com)

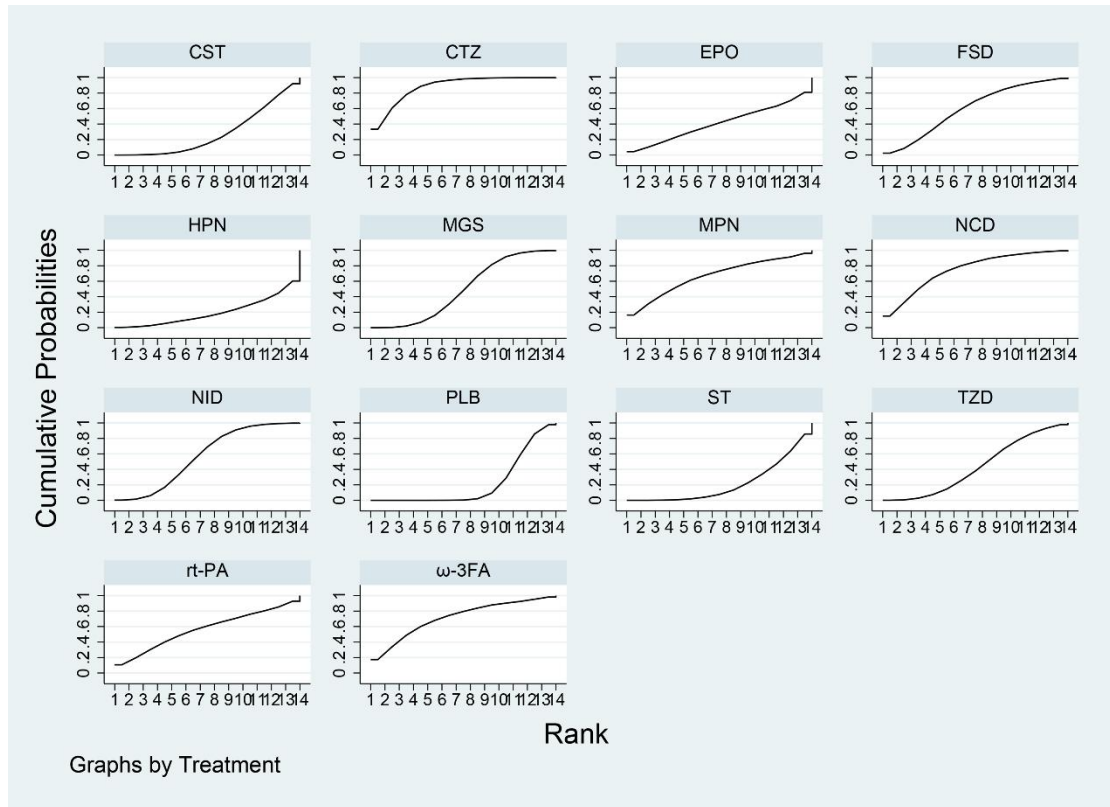

Supplement sucra plot. legend the surface under the cumulative ranking curve (SUCRA) was generated to display a simple numerical statistical cumulative ranking probability plots of various interventions. SUCRA would be 1 if a treatment is certainly at the highest level or highly effective, while zero undoubtedly means that the treatment is the worst.
