# Supplementary material for: Effectiveness comparisons of drug therapies for postoperative aneurysmal subarachnoid hemorrhage patients: network meta‑analysis and systematic review
Source: PubMed Central journal article supplement (PMC8314452; doi:10.1186/s12883-021-02303-8), 2021-07-27
Supplement: 12883_2021_2303_MOESM5_ESM.pdf [file 12883_2021_2303_MOESM5_ESM.pdf]

# Effectiveness Comparisons of Drug Therapies for Postoperative Aneurysmal Subarachnoid Hemorrhage Patients: Network Meta-analysis and systematic review

Wanli Yu<sup>1#</sup>, MM, Yizhou Huang<sup>2#</sup>, MM, Xiaolin Zhang<sup>1</sup>, MM, Huirong Luo<sup>3</sup>, Weifu Chen<sup>1</sup>, MD, Yongxiang Jiang<sup>1\*</sup>, MD, Yuan Cheng<sup>1\*</sup>, MD

<sup>1</sup> Department of Neurosurgery, The Second Affiliated Hospital, Chongqing Medical University, Chongqing, China

<sup>2</sup> Department of Endocrinology, The Second Affiliated Hospital, Chongqing Medical University, Chongqing, China

<sup>3</sup> Department of Psychiatry, The First Affiliated Hospital, Chongqing Medical University, Chongqing, China

# Wanli Yu and Yizhou Huang contributed equally to this project.

**\* Correspondence:**

Yuan Cheng, Department of Neurosurgery, The Second Affiliated Hospital, Chongqing Medical University; Yongxiang Jiang, Department of Neurosurgery, The Second Affiliated Hospital, Chongqing Medical University;

E-mail address: [chengyuan@hospital.cqmu.edu.cn](mailto:chengyuan@hospital.cqmu.edu.cn) and [doctorjiang2003@163.com](mailto:doctorjiang2003@163.com)

```

# Binomial likelihood, logit link

# Random effects model for multi-arm trials

model{ # *** PROGRAM STARTS

for(i in 1:ns){ # LOOP THROUGH STUDIES

w[i,1] <- 0 # adjustment for multi-arm trials is zero for control arm

delta[i,1] <- 0 # treatment effect is zero for control arm

mu[i] ~ dnorm(0,.0001) # vague priors for all trial baselines

for (k in 1:na[i]) { # LOOP THROUGH ARMS

r[i,k] ~ dbin(p[i,k],n[i,k]) # binomial likelihood

logit(p[i,k]) <- mu[i] + delta[i,k] # model for linear predictor

rhat[i,k] <- p[i,k] * n[i,k] # expected value of the numerators

dev[i,k] <- 2 * (r[i,k] * (log(r[i,k])-log(rhat[i,k]))) #Deviance contribution
+ (n[i,k]-r[i,k]) * (log(n[i,k]-r[i,k]) - log(n[i,k]-rhat[i,k])))

}

resdev[i] <- sum(dev[i,1:na[i]]) # summed residual deviance contribution for this trial

for (k in 2:na[i]) { # LOOP THROUGH ARMS

delta[i,k] ~ dnorm(md[i,k],taud[i,k]) # trial-specific LOR distributions

md[i,k] <- d[t[i,k]] - d[t[i,1]] + sw[i,k] # mean of LOR distributions (with multi-arm trial correction)

taud[i,k] <- tau *2*(k-1)/k # precision of LOR distributions (with multi-arm trial correction)

w[i,k] <- (delta[i,k] - d[t[i,k]] + d[t[i,1]]) # adjustment for multi-arm RCTs

sw[i,k] <- sum(w[i,1:k-1])/(k-1) # cumulative adjustment for multi-arm trials

}

}

totresdev <- sum(resdev[]) #Total Residual Deviance

d[1] <- 0 # treatment effect is zero for reference treatment

for (k in 2:nt){ d[k] ~ dnorm(0,.0001) } # vague priors for treatment effects

sd ~ dunif(0,5) # vague prior for between-trial SD.

tau <- pow(sd,-2) # between-trial precision = (1/between-trial variance)

# pairwise ORs and LORs for all possible pair-wise comparisons, if nt>2

```

```

for (c in 1:(nt-1)) {
  for (k in (c+1):nt) {
    or[c,k] <- exp(d[k] - d[c])
    lor[c,k] <- (d[k]-d[c])
  }
}

# Ranking and probabilities for treatment
for(k in 1:nt) {
  order[k]<- nt+1-rank(d[],k) #events are good
  most.effective[k]<-equals(order[k],1)
  for(j in 1:nt) {
    effectiveness[k,j]<- equals(order[k],j)
    cumeffectiveness[k,j]<- sum(effectiveness[k,1:j])
  }
}

#SUCRA
for(k in 1:nt) {
  SUCRA[k]<- sum(cumeffectiveness[k,1:(nt-1)])/(nt-1)
}

}

list(ns=44, nt=14) # tolerability
t[,1] t[,2] r[,1] n[,1] r[,2] n[,2] na[]
1 2 28 82 28 72 2
2 3 31 51 34 53 2
1 2 185 276 223 278 2
1 2 26 54 49 73 2
2 6 48 60 49 55 2
1 2 26 39 28 31 2

```

1 3 27 53 34 54 2  
1 3 10 22 15 23 2  
1 3 13 31 20 27 2  
1 3 83 127 90 122 2  
1 3 34 43 28 40 2  
1 3 446 597 448 606 2  
1 3 16 30 20 30 2  
1 3 52 158 57 169 2  
1 3 9 15 11 15 2  
1 4 61 74 70 74 2  
1 4 51 55 52 54 2  
1 4 24 51 39 49 2  
1 4 20 24 24 26 2  
1 5 66 96 79 107 2  
1 5 287 383 542 764 2  
1 5 131 172 136 181 2  
1 5 48 55 48 52 2  
1 6 95 136 98 131 2  
2 6 28 34 27 33 2  
2 6 31 32 31 32 2  
1 7 19 40 23 40 2  
1 7 4 19 519 2  
1 7 44 54 46 54 2  
1 7 12 16 12 16 2  
1 7 10 20 7 19 2  
1 7 222 247 192 229 2  
1 14 421 455 427 447 2  
1 14 5 12 11 12 2  
1 8 38 42 43 61 2  
1 8 183 256 167 251 2
